# Supplementary material
Source: PubMed Central journal article supplement (PMC9035342)

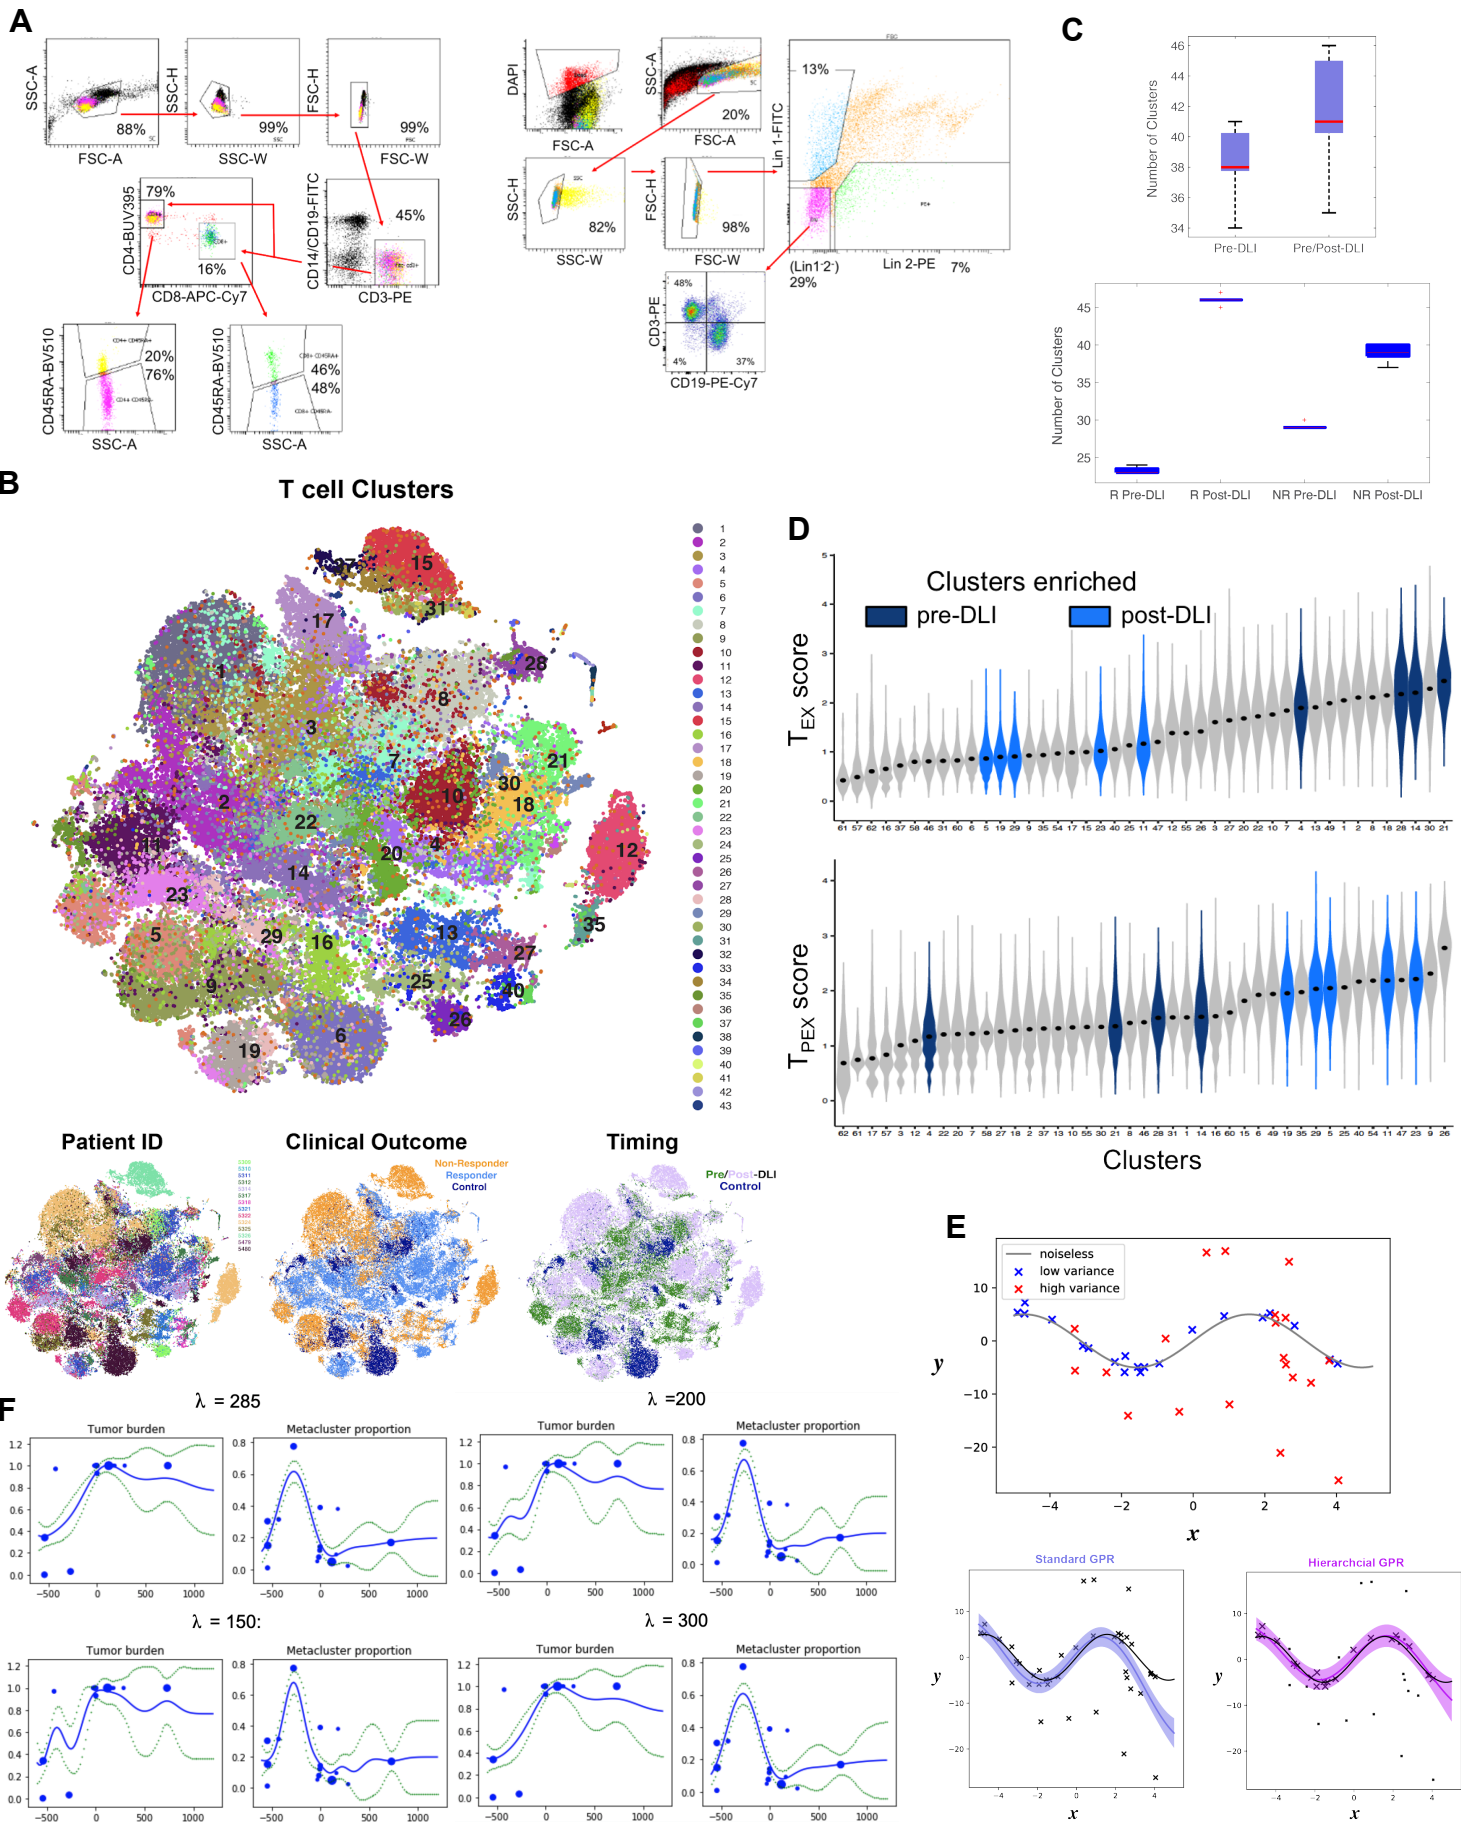

Supplement: NIHMS1776132-supplement-Figure_S6.pdf [file NIHMS1776132-supplement-Figure_S6.pdf]

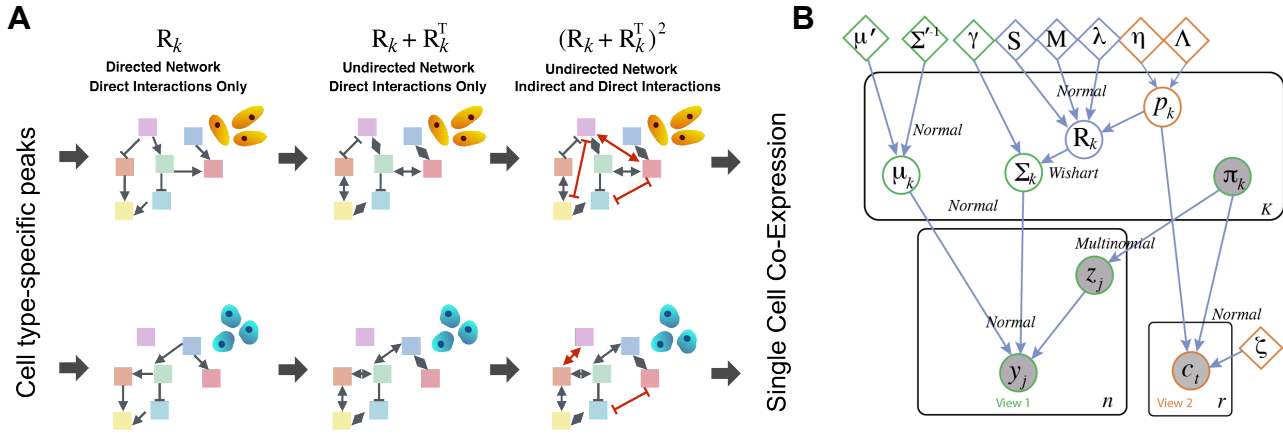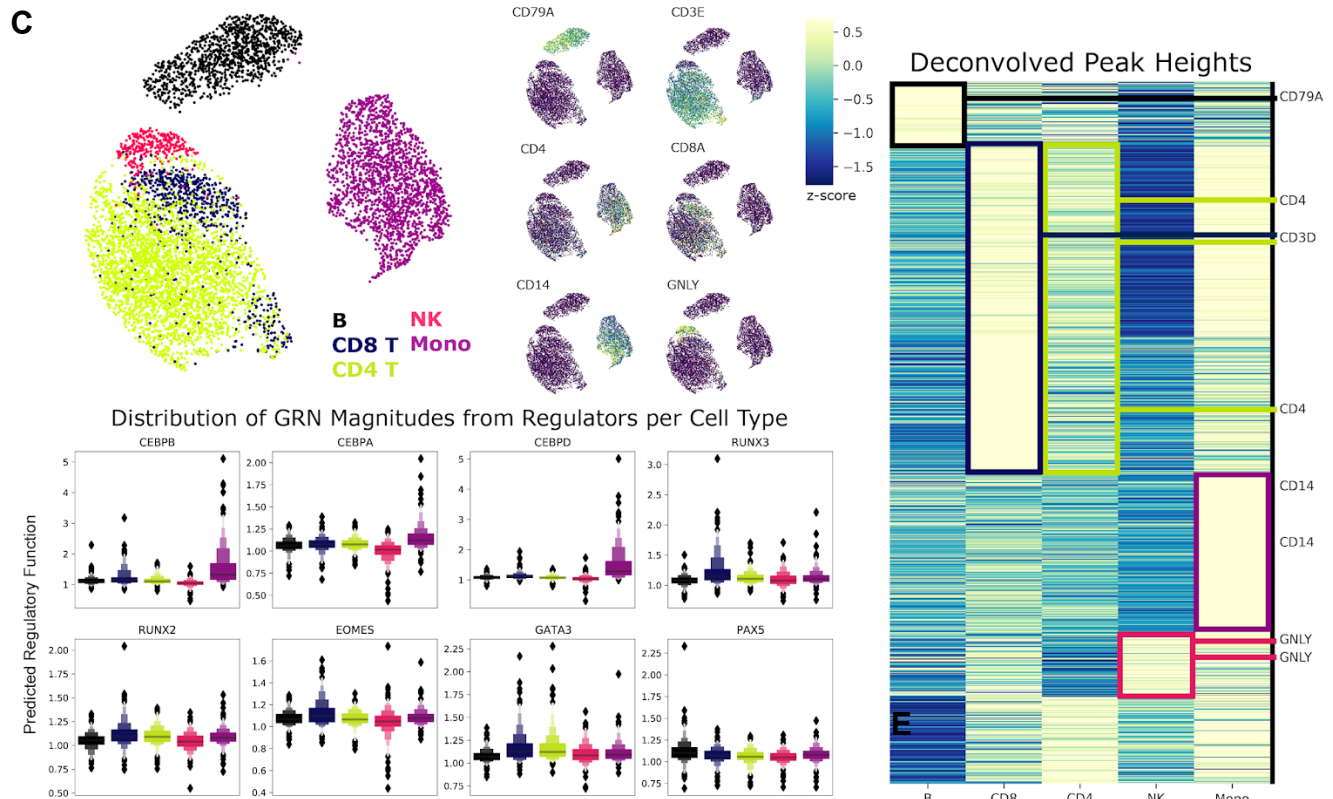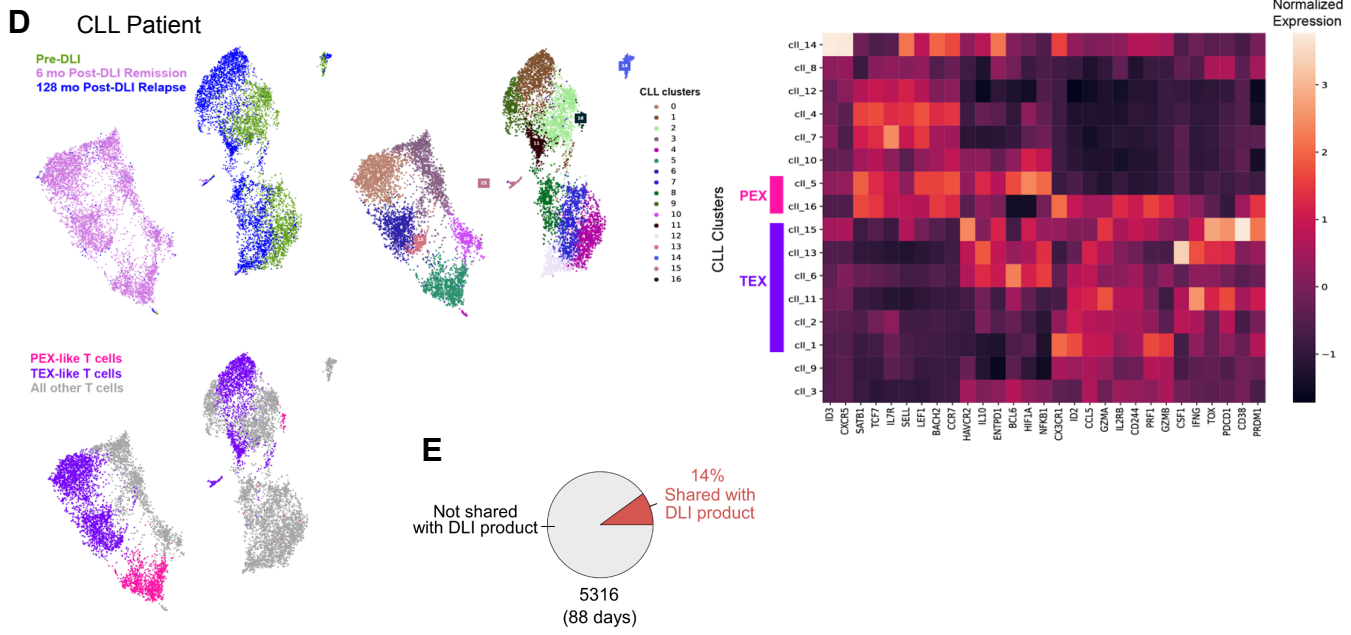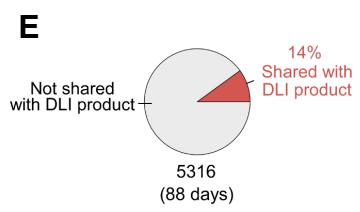

Supplement: NIHMS1776132-supplement-Figure_S7.pdf [file NIHMS1776132-supplement-Figure_S7.pdf]
